# Supplementary material for: Genome Mining‐Mediated Discovery of a New Avermipeptin Analogue in Streptomyces actuosus ATCC 25421
Source: PubMed Central journal article supplement — ChemistryOpen. 2018 Jul 25;7(7):558–61. doi: 10.1002/open.201800130 (PMC6060280; doi:10.1002/open.201800130), 2018-07-25
Supplement: OPEN-7-558-s001.pdf [file OPEN-7-558-s001.pdf]

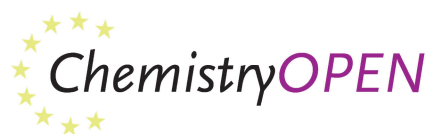

## Supporting Information

© 2018 The Authors. Published by Wiley-VCH Verlag GmbH & Co. KGaA, Weinheim

### **Genome Mining-Mediated Discovery of a New Avermipeptin Analogue in *Streptomyces actuosus* ATCC 25421**

Weiyang Liu,<sup>[a]</sup> Fengxian Sun,<sup>[b]</sup> and Yang Hu\*<sup>[a]</sup>

open\_201800130\_sm\_miscellaneous\_information.pdf

## Table of Contents

|                                                                                                                                |    |
|--------------------------------------------------------------------------------------------------------------------------------|----|
| Table S1 Features of <i>S. actuosus</i> ATCC 25421 chromosome.....                                                             | 2  |
| Table S2 Secondary metabolites in <i>S. actuosus</i> ATCC 25421 .....                                                          | 3  |
| Table S3 Deduced functions of ORFs in the actuospeptin biosynthetic gene cluster .                                             | 6  |
| Table S4 Minimum inhibitory concentrations (MICs) of avermipeptin B .....                                                      | 7  |
| Figure S1. COG-based functional classification of genes located on <i>S. actuosus</i><br>ATCC 25421 genome .....               | 8  |
| Figure S2. GO-based functional classification of genes located on <i>S. actuosus</i> ATCC<br>25421 genome.....                 | 9  |
| Figure S3. KEGG-based functional classification of genes located on <i>S. actuosus</i><br>ATCC 25421 genome .....              | 10 |
| Figure S4. Distribution of secondary metabolite gene clusters in <i>S. actuosus</i> ATCC<br>25421 .....                        | 11 |
| Figure S5. HPLC analysis of the extracts from (A) <i>S. lividans</i> TK24 and (B) <i>S. lividans</i><br>TK24/pSET152-ave ..... | 12 |
| Experimental Section.....                                                                                                      | 13 |

**Table S1 Features of *S. actuosus* ATCC 25421 chromosome.**

| Component of chromosome  | Property     |
|--------------------------|--------------|
| Genome size              | 8,145,579 bp |
| GC content               | 72.53%       |
| Gene Average Length (bp) | 958          |
| Number of Contigs        | 1            |
| rRNAs                    | 18           |
| tRNAs                    | 70           |
| sRNAs                    | 16           |
| Protein-coding genes     | 7,536        |

**Table S2 Secondary metabolites in *S. actuosus* ATCC 25421.**

| Cluster | Type                                            | From   | To     | Most similar known biosynthetic gene cluster (percent of similarity, %) | MIBiG BGC-ID    |
|---------|-------------------------------------------------|--------|--------|-------------------------------------------------------------------------|-----------------|
| 1       | PKS-NRPS                                        | 35338  | 113331 | Antimycin (86)                                                          | BGC0000958_c1   |
| 2       | $\beta$ -lactam                                 | 117855 | 139684 | Spinosad (8)                                                            | BGC0000148_c1   |
| 3       | Other                                           | 158144 | 182801 | Herboxidiene (2)                                                        | BGC0001065_c1   |
| 4       | Other                                           | 373066 | 398132 | Nocathiacin (4)                                                         | BGC0000609_c1   |
| 5       | Melanin                                         | 608692 | 619063 | Melanin (71)                                                            | BGC0000908_c1   |
| 6       | Terpene                                         | 683296 | 708900 | Carotenoid (63)                                                         | BGC0000633_c1   |
| 7       | Other                                           | 963361 | 977997 | Macrotretrolide (33)                                                    | BGC0000244_c1   |
| 8       | Other                                           | 118802 | 121042 | Kirromycin (3)                                                          | BGC0001070_c1   |
|         |                                                 | 4      | 4      |                                                                         |                 |
| 9       | Saccharide                                      | 164002 | 166188 | -                                                                       | -               |
|         |                                                 | 3      | 4      |                                                                         |                 |
| 10      | Other                                           | 175536 | 176861 | Calicheamicin (2)                                                       | BGC0000033_c1   |
|         |                                                 | 0      | 1      |                                                                         |                 |
| 11      | Ectoine                                         | 182689 | 183729 | Ectoine (100)                                                           | BGC0000853_c1   |
|         |                                                 | 3      | 7      |                                                                         |                 |
| 12      | Other                                           | 220837 | 224257 | Nataxazole (7)                                                          | BGC0001213_c1   |
|         |                                                 | 9      | 0      |                                                                         |                 |
| 13      | Indole                                          | 245752 | 247862 | Lactonamycin (5)                                                        | BGC0000238_c1   |
|         |                                                 | 5      | 8      |                                                                         |                 |
| 14      | PKS                                             | 248334 | 253660 | Rabelomycin (41)                                                        | BGC0000262_c1   |
|         |                                                 | 0      | 4      |                                                                         |                 |
| 15      | Fatty acid                                      | 259742 | 261842 | Tetracenomycin (16)                                                     | BGC0000275_c1   |
|         |                                                 | 3      | 4      |                                                                         |                 |
| 16      | Other                                           | 269117 | 270690 | Salinilactam (8)                                                        | BGC0000142_c1   |
|         |                                                 | 0      | 6      |                                                                         |                 |
| 17      | Saccharide                                      | 282051 | 284565 | -                                                                       | -               |
|         |                                                 | 8      | 9      |                                                                         |                 |
| 18      | Saccharide-Melanin-Butyrolactone-fatty acid-PKS | 296333 | 305321 | RK-682 (45)                                                             | BGC0000140_c1   |
|         |                                                 | 1      | 4      |                                                                         |                 |
| 19      | Siderophore                                     | 311542 | 312719 | Desferrioxamine (100)                                                   | B BGC0000940_c1 |
|         |                                                 | 7      | 9      |                                                                         |                 |
| 20      | Other                                           | 348122 | 349821 | Echosides (11)                                                          | BGC0000340_c1   |
|         |                                                 | 4      | 2      |                                                                         |                 |
| 21      | Other                                           | 385096 | 385939 | Streptolydigin (5)                                                      | BGC0001046_c1   |
|         |                                                 | 3      | 2      |                                                                         |                 |
| 22      | Fatty acid-Butyrolactone                        | 418530 | 423009 | Simocyclinone (6)                                                       | BGC0001072_c1   |
|         |                                                 | 2      | 6      |                                                                         |                 |

|    |                             |             |             |                               |               |
|----|-----------------------------|-------------|-------------|-------------------------------|---------------|
| 23 | PKS                         | 433723<br>1 | 437974<br>6 | Spore pigment (83)            | BGC0000271_c1 |
| 24 | Arylpolyene                 | 443642<br>3 | 447758<br>3 | Lomaiviticin (3)              | BGC0000240_c1 |
| 25 | Other                       | 484535<br>2 | 486302<br>5 | Coelimycin (8)                | BGC0000038_c1 |
| 26 | Thiopeptide                 | 490367<br>5 | 494150<br>3 | Nosiheptide (80)              | BGC0000610_c1 |
| 27 | NRPS                        | 530879<br>2 | 539369<br>9 | Telomycin (17)                | BGC0001406_c1 |
| 28 | Other                       | 543904<br>2 | 545814<br>0 | Meilingmycin (2)              | BGC0000093_c1 |
| 29 | Terpene                     | 556221<br>9 | 558331<br>6 | Albaflavenone (100)           | BGC0000660_c1 |
| 30 | Fatty acid                  | 567189<br>3 | 569367<br>7 | Fluostatin (3)                | BGC0000223_c1 |
| 31 | Other                       | 637619<br>7 | 638671<br>4 | JBIR-34, JBIR-35 (12)         | BGC0000376_c1 |
| 32 | Bacteriocin                 | 643780<br>6 | 644914<br>9 | -                             | -             |
| 33 | Terpene-Butyrolactone       | 645962<br>8 | 648608<br>5 | $\gamma$ -butyrolactone (100) | BGC0000850_c1 |
| 34 | Saccharide                  | 659396<br>4 | 662836<br>0 | -                             | -             |
| 35 | Bacteriocin-PKS-Siderophore | 663518<br>0 | 674296<br>7 | A-503083 (7)                  | BGC0000288_c1 |
| 36 | Other                       | 678973<br>8 | 680692<br>7 | Kanamycin (20)                | BGC0000704_c1 |
| 37 | Other                       | 680700<br>5 | 681718<br>4 | Kanamycin (3)                 | BGC0000703_c1 |
| 38 | Other                       | 681719<br>1 | 682399<br>8 | Kanamycin (1)                 | BGC0000703_c1 |
| 39 | Fatty acid                  | 687284<br>4 | 689379<br>1 | -                             | -             |
| 40 | Other                       | 693443<br>2 | 695071<br>8 | Kinamycin (5)                 | BGC0000236_c1 |
| 41 | Other                       | 700193<br>9 | 700819<br>8 | GE81112 (7)                   | BGC0000360_c1 |
| 42 | Terpene                     | 705418<br>8 | 708094<br>1 | Hopene (92)                   | BGC0000663_c1 |
| 43 | Saccharide                  | 712084<br>7 | 715598<br>3 | -                             | -             |
| 44 | Other                       | 723036<br>9 | 724172<br>1 | Lysolipin (4)                 | BGC0000242_c1 |

|    |              |             |             |                              |               |
|----|--------------|-------------|-------------|------------------------------|---------------|
| 45 | Other        | 758417<br>4 | 759275<br>2 | Oxazolomycin (6)             | BGC0001106_c1 |
| 46 | Lantipeptide | 763467<br>8 | 766463<br>0 | Informatipeptin (85)         | BGC0000518_c1 |
| 47 | Lassoptide   | 790789<br>0 | 793057<br>7 | -                            | -             |
| 48 | NRPS         | 797412<br>7 | 802148<br>1 | Leinamycin (2)               | BGC0001101_c1 |
| 49 | Other        | 807167<br>5 | 807745<br>1 | 9-methylstreptimidone<br>(9) | BGC0000171_c1 |

---

**Table S3 Deduced functions of ORFs in the actuospeptin biosynthetic gene cluster.**

| Gene                                           | Size <sup>[a]</sup> | Protein homologue <sup>[b]</sup> and origin                                           | Identity, % | Proposed function          |
|------------------------------------------------|---------------------|---------------------------------------------------------------------------------------|-------------|----------------------------|
| <i>aveA</i><br>complement<br>(7648041-7649948) | 635                 | ABC transporter ATP-binding protein<br>[Streptomyces sp. Ag82_G6-1]<br>WP_097222466.1 | 72          | transporter                |
| <i>aveB</i><br>complement<br>(7650014-7651747) | 577                 | ABC transporter ATP-binding protein<br>[Streptomyces sp. CdTB01]<br>WP_058921347.1    | 78          | transporter                |
| <i>aveS</i><br>complement<br>(7651849-7651965) | 38                  | SapB/AmfS family lantipeptide<br>[Streptomyces sp. 142MFCoI3.1]<br>WP_028798592.1     | 100         | precursor<br>peptide       |
| <i>aveT</i><br>complement<br>(7652048-7654630) | 860                 | lantipeptide synthetase [Streptomyces<br>sp. Ru71] WP_103782009.1                     | 85          | lantipeptide<br>synthetase |

<sup>[a]</sup>Numbers are in amino acids. <sup>[b]</sup>NCBI accession numbers are given in parentheses.

**Table S4 Minimum inhibitory concentrations (MICs) of avermipeptin B.**

| Organism                                                       | MIC ( $\mu\text{g/mL}$ ) |
|----------------------------------------------------------------|--------------------------|
| <i>Staphylococcus aureus</i> subsp. <i>aureus</i><br>ATCC43300 | 0.0016                   |
| <i>Enterococcus faecalis</i> ATCC29212                         | 0.0032                   |
| <i>Bacillus subtilis</i> ATCC6633                              | 0.0032                   |



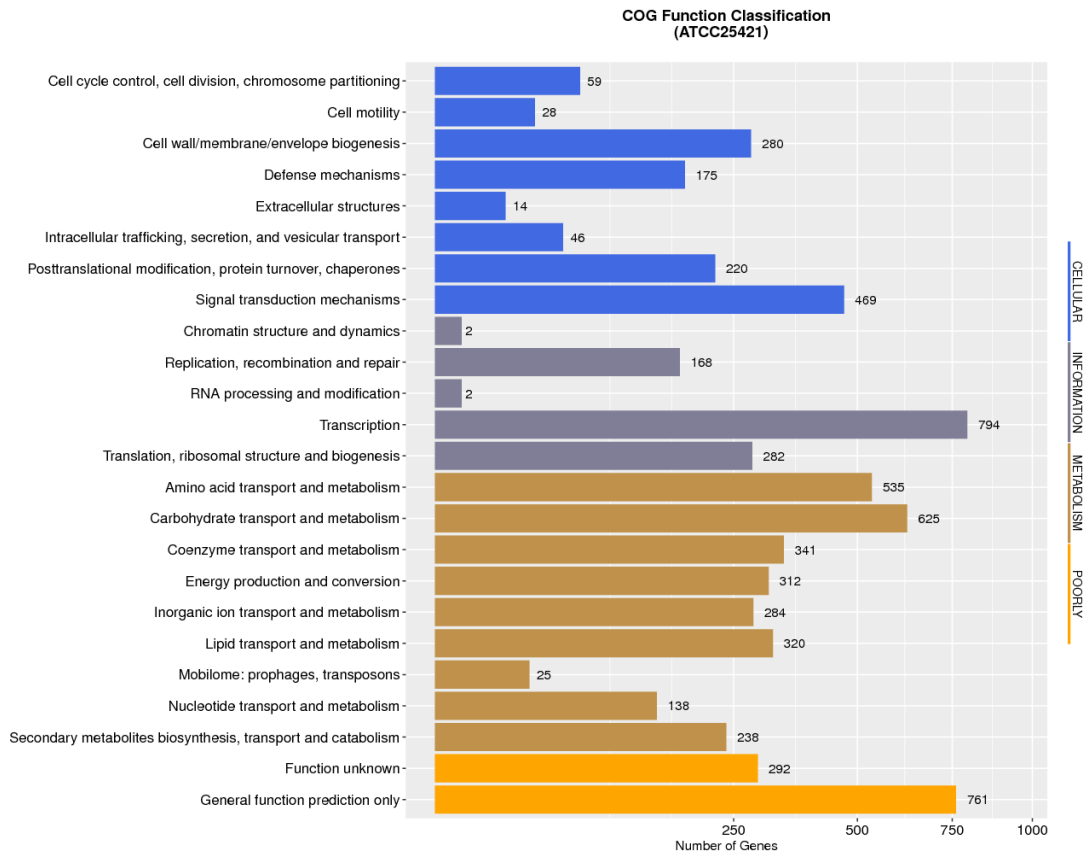

**Figure S1. COG-based functional classification of genes located on *S. actuosus* ATCC 25421 genome.** Genes might be classified into more than one category.

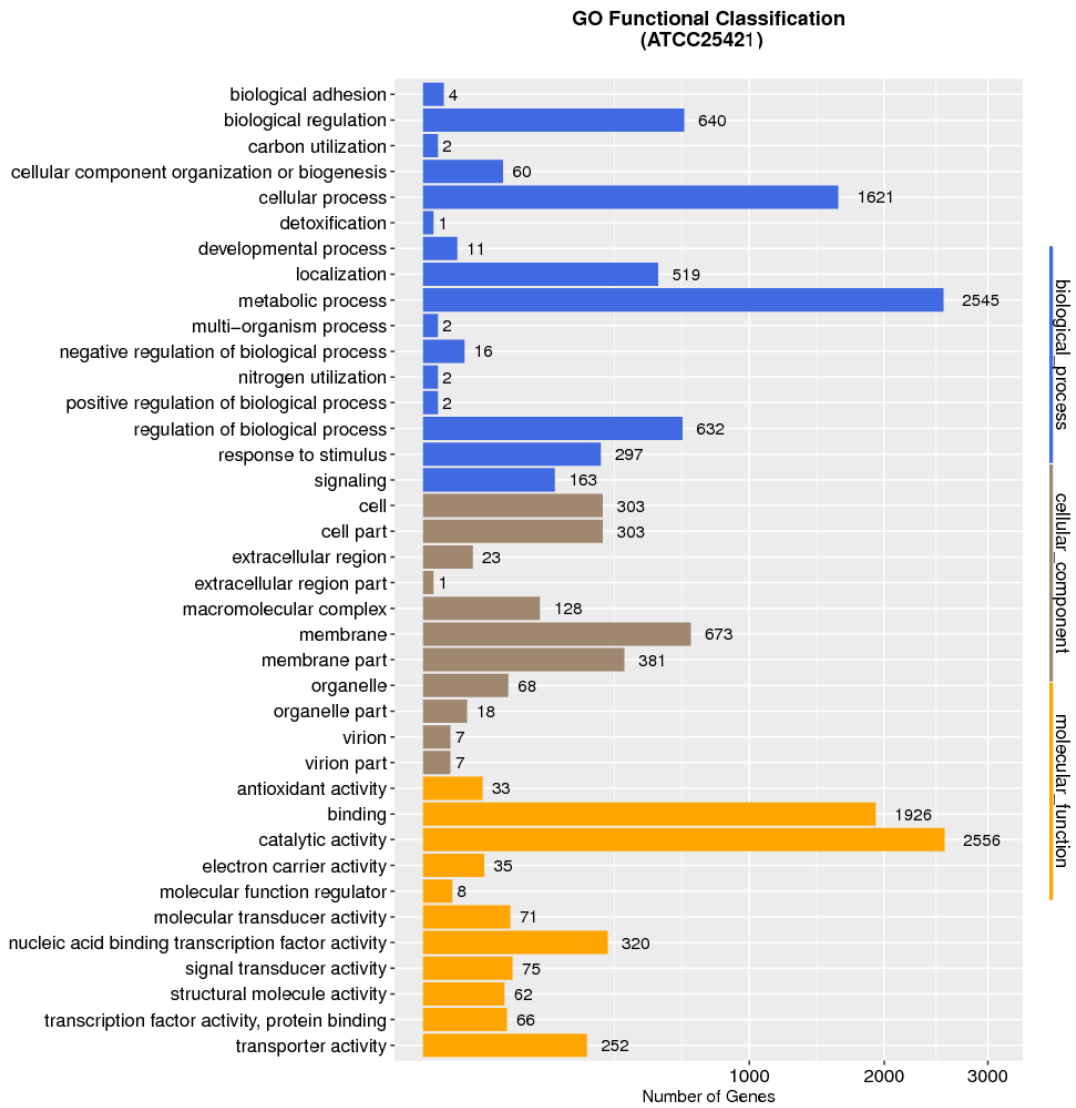

**Figure S2. GO-based functional classification of genes located on *S. actuosus* ATCC 25421 genome.** Genes might be classified into more than one category.

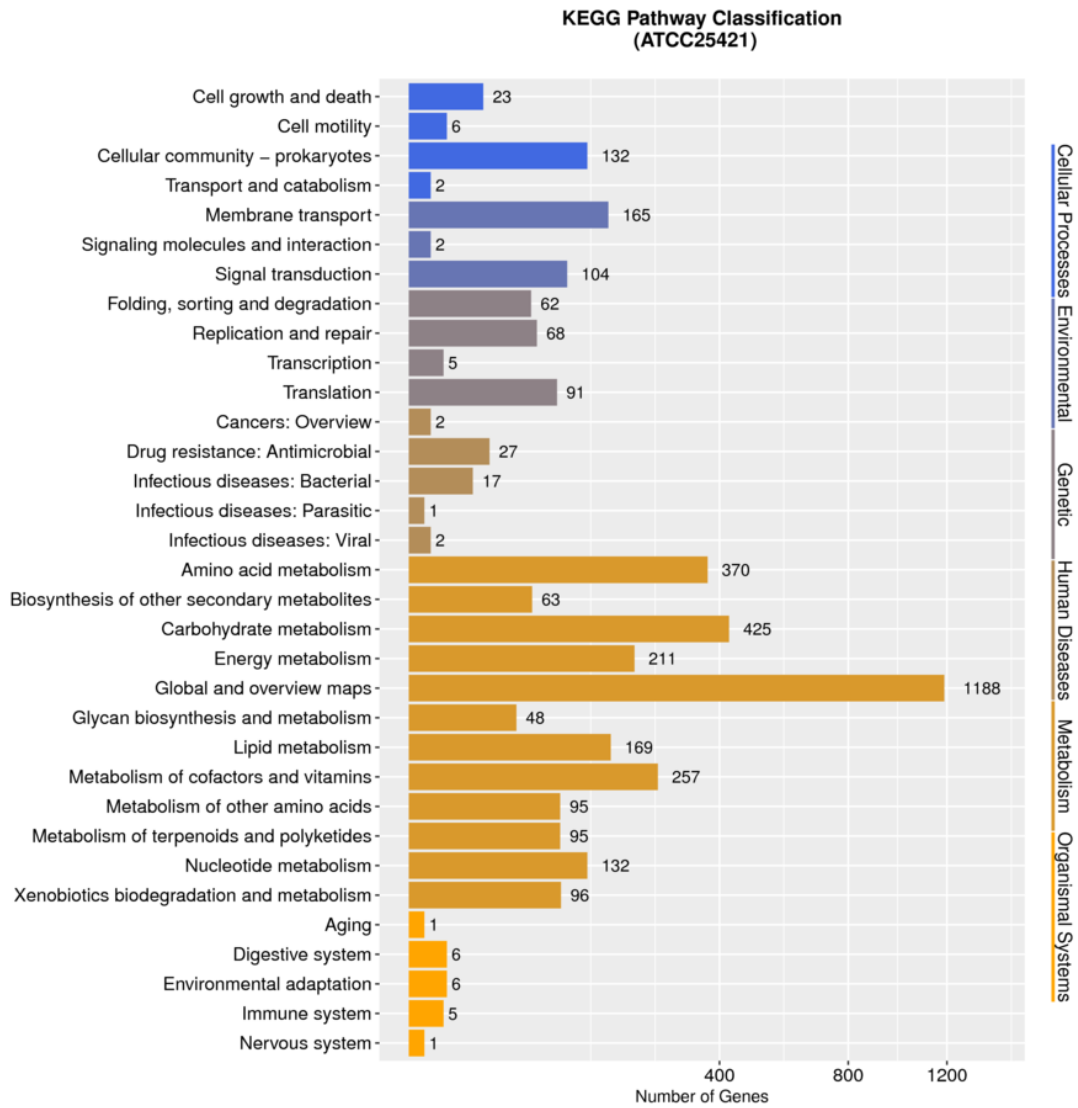

**Figure S3. KEGG-based functional classification of genes located on *S. actuosus* ATCC 25421 genome.** Genes might be classified into more than one category.

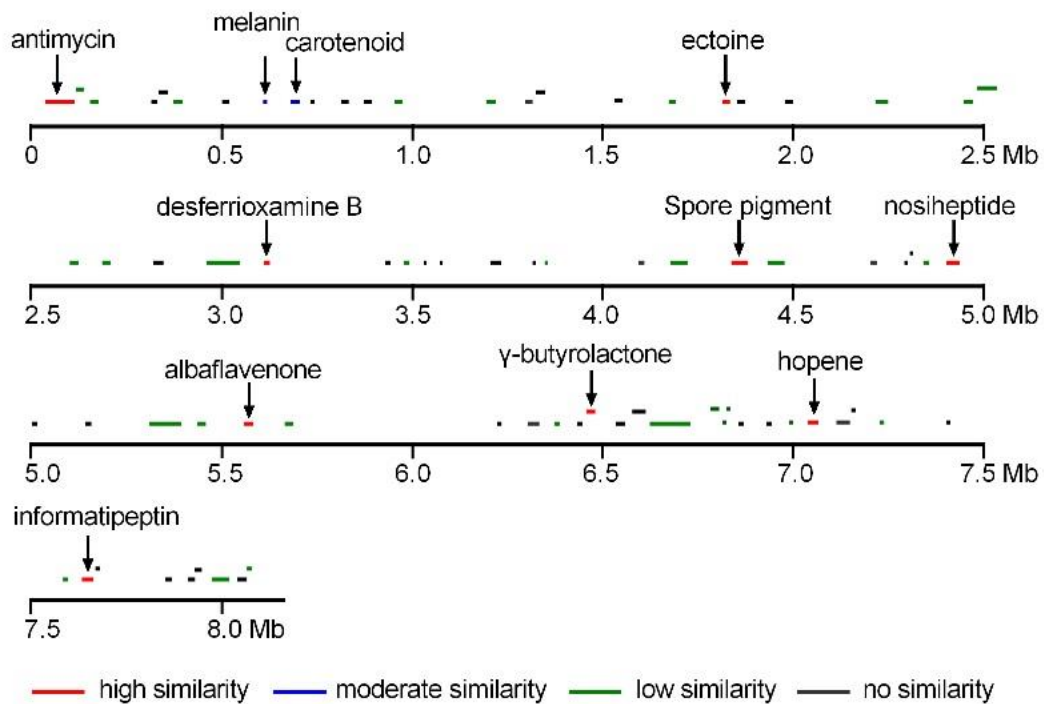

**Figure S4. Distribution of secondary metabolite gene clusters in *S. actuosus* ATCC 25421.** The degree of similarity with known gene clusters from other microorganisms was shown with different color of the bars.

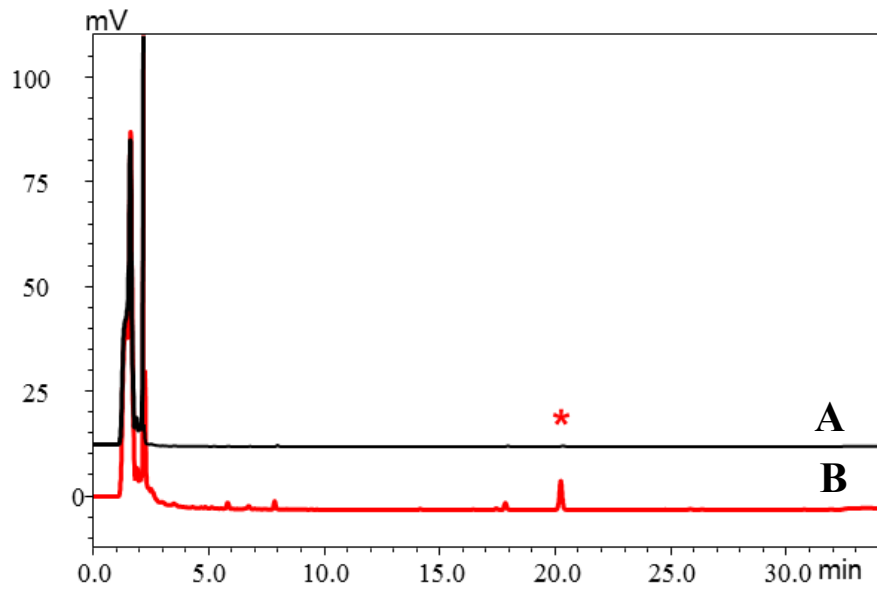

**Figure S5. HPLC analysis of the extracts from (A) *S. lividans* TK24 and (B) *S. lividans* TK24/pSET152-ave.**

## **Experimental Section**

### **Genome sequencing and assembly**

The *S. actuosus* ATCC 25421 genome was sequenced using a PacBio RS II platform and Illumina HiSeq 4000 platform at the Beijing Genomics Institute (BGI, Shenzhen, China). Four SMRT cells Zero-Mode Waveguide arrays of sequencing, were used by the PacBio platform to generate the subreads set. PacBio subreads (length < 1 kb) were removed. The program Pbdagcon (<https://github.com/PacificBiosciences/pbdagcon>) was used for selfcorrection. Draft genomic unitigs, which are uncontested groups of fragments, were assembled using the Celera Assembler against a highquality corrected circular consensus sequence subreads set. To improve the accuracy of the genome sequences, GATK (<https://www.broadinstitute.org/gatk/>) and SOAP tool packages (SOAP2, SOAPsnp, SOAPindel) were used to make single-base corrections. To trace the presence of any plasmid, the filtered Illumina reads were mapped using SOAP to the bacterial plasmid database (<http://www.ebi.ac.uk/genomes/plasmid.html>, last accessed July 8, 2016).

### **Genome component prediction**

Gene prediction was performed on the *S. actuosus* ATCC 25421 genome assembly by glimmer3 (<http://www.cbcb.umd.edu/software/glimmer/>) with Hidden Markov models. tRNA, rRNA and sRNAs recognition made use of tRNAscan-SE (Lowe and Eddy, 1997).

### **Gene annotation and protein classification**

The best hit abstracted using Blast alignment tool for function annotation. Seven databases which are KEGG (Kyoto Encyclopedia of Genes and Genomes), COG (Clusters of Orthologous Groups), NR (Non-Redundant Protein Database databases), Swiss-Prot, and GO (Gene Ontology), TrEMBL,

EggNOG are used for general function annotation.

### **Cloning of the *act* gene cluster into the expression vector pSET152**

PCR method was used for amplification of the eryth gene cluster from the genome of *S. actuosus* ATCC 25421 by using the primers P1/P2 (P1: 5'-CATATGCCCCGGACG GTCACACGCGTCAACAATGGG-3'; P2; 5-TCTAGAGGCGTCGGCGAGGCGTT CCAGACTGGCGCG-3'). Then, the recovered fragments were cloned to pMD-18T simple vector and confirmed by DNA sequencing. The recombinant plasmid was digested with the restriction enzymes *NdeI* and *XbaI*, and then ligated into the vector pSET152 under the control of a promoter *PermE\** to give a recombinant plasmid pSET152-ave. The recombinant plasmid pSET152-ave was transformed in competent *E. coli* DH5a cells for amplification and verified by restriction enzymes *NdeI* and *XbaI* and DNA sequencing.

### ***E. coli*-*Streptomyces* conjugation**

The recombinant plasmid pSET152-act was transformed by electroporation into *E. coli* ET12567/pUZ8002 according to a standard protocol. The pSET152-ave was introduced into *S. lividans* TK24 by *E. coli*-*Streptomyces* conjugation as described previously<sup>[1]</sup>.

### **Production and Isolation of type III lantibiotics**

*S. lividans* TK24 and *S. lividans* TK24/pSET152-ave were cultivated on ISP2 agar plates (4 g yeast extracts, 10 g malt extract, 4 g D -glucose, 18 g agar, and 1000 ml water) containing apramycin (25 mg/ml) at 28°C. The plates were incubated for 10 d at 28 °C. The agar ~ 1 cm<sup>2</sup> from each plate was extracted with acetonitrile (500 µl) and centrifugated (14000 rpm, 5 min), the solution was collected for further experiments.

## HPLC-ESI-MS/MS analysis of microbial extracts

Lantibiotic-containing samples were analyzed by HPLC-ESI-MS/MS experiments according to the methods described previously<sup>[2]</sup>.

## Isolation and extraction of avermipeptin B

Isolation and extraction of avermipeptin B from *S. lividans* TK24/pSET152-ave were performed according to the methods described previously<sup>[2]</sup>.

## Assay of antibacterial activity

Avermipeptin B was dissolved in DMSO to produce a stock solution (1000 µg/mL), which was serially diluted into Mueller-Hinton broth (50 µL) in a 96-well microtiter plate. For the test of *Staphylococcus aureus*, *Bacillus subtilis* and *Enterococcus faecali*, the final concentration was ranging from 0.0256 to 0 µg /mL. After the compounds were diluted, 50 µl aliquots of the test strains (about  $5 \times 10^{-5}$  CFU/mL) were added to the appropriate wells of the microtiter plate. After incubation at 37°C 150 rpm for 18-24 h, the MIC was determined as the lowest concentration of compound that inhibits visible bacterial growth. All assays were repeated for 3 times.

## References

- [1] T. Kieser, M. J. Bibb, M. J. Buttner, K. F. Chater, D. A. Hopwood, **2000**, 3.
- [2] G. H. Völler, J. M. Krawczyk, A. Pesic, B. Krawczyk, J. Nachtigall, R. D. Süssmuth, **2012**, 13, 1174-1183.
